# Supplementary material
Source: bioRxiv or medRxiv preprint supplement (https://www.biorxiv.org/highwire/filestream/30578/field_highwire_adjunct_files/7/106948-8.pdf)
Supplement: Supplementary file [file 106948-8.pdf]

**Supplementary Table S8.** Enrichment and depletion levels within positively-selected gibbon genes**Germ Layers**

| Name     | Enrichment ratio | Observed | Expected    |
|----------|------------------|----------|-------------|
| endoderm | 1.083459678      | 43       | 39.68767908 |
| ectoderm | 0.981969566      | 49       | 49.89971347 |
| mesoderm | 0.970123531      | 50       | 51.53982808 |

**Organs**

| Name           | Enrichment ratio | Observed | Expected    |
|----------------|------------------|----------|-------------|
| appendix       | 3.077601411      | 2        | 0.649856734 |
| salivary gland | 2.656012177      | 9        | 3.388538682 |
| duodenum       | 2.251903471      | 10       | 4.440687679 |
| placenta       | 2.005747126      | 9        | 4.487106017 |
| lymph vessels  | 1.97845805       | 3        | 1.516332378 |
| sweat gland    | 1.937127864      | 11       | 5.678510029 |
| breast         | 1.932848737      | 16       | 8.277936963 |
| anus           | 1.831608937      | 7        | 3.821776504 |
| pancreas       | 1.767216435      | 21       | 11.88309456 |
| rectum         | 1.765094927      | 13       | 7.36504298  |
| biliary tract  | 1.755372657      | 11       | 6.266475645 |
| sternum        | 1.721690953      | 26       | 15.10143266 |
| fibula         | 1.713934929      | 24       | 14.00286533 |
| tibia          | 1.693352741      | 24       | 14.1730659  |
| vocal cords    | 1.685990338      | 9        | 5.338108883 |
| abdominal wall | 1.674853207      | 17       | 10.15014327 |
| testis         | 1.669153658      | 25       | 14.97765043 |
| scapula        | 1.66786141       | 24       | 14.38968481 |
| aorta          | 1.661904762      | 9        | 5.415472779 |
| radius         | 1.660718534      | 24       | 14.45157593 |
| femur          | 1.647034394      | 25       | 15.17879656 |
| ulna           | 1.641387419      | 24       | 14.6217765  |
| liver          | 1.627364775      | 28       | 17.20573066 |
| clavicle       | 1.620805759      | 24       | 14.80744986 |

|                     |             |    |             |
|---------------------|-------------|----|-------------|
| chest wall          | 1.619930215 | 29 | 17.90200573 |
| humerus             | 1.607369027 | 24 | 14.93123209 |
| bone marrow         | 1.59758635  | 11 | 6.885386819 |
| adrenal gland       | 1.589253188 | 9  | 5.663037249 |
| shin                | 1.57633243  | 25 | 15.85959885 |
| thigh               | 1.57633243  | 26 | 16.49398281 |
| thyroid             | 1.57633243  | 7  | 4.440687679 |
| rib                 | 1.57236515  | 29 | 18.44355301 |
| rib cage            | 1.57236515  | 29 | 18.44355301 |
| pharynx             | 1.562045429 | 16 | 10.24297994 |
| cerebrospinal fluid | 1.559428061 | 9  | 5.771346705 |
| nail                | 1.541624193 | 13 | 8.432664756 |
| heart               | 1.525512271 | 41 | 26.87621777 |
| uterus              | 1.520697168 | 20 | 13.15186246 |
| spinal column       | 1.518315496 | 30 | 19.75873926 |
| teeth               | 1.508554009 | 19 | 12.59484241 |
| heart valve         | 1.501496446 | 23 | 15.31805158 |
| kidney              | 1.498658078 | 32 | 21.35243553 |
| vertebrae           | 1.498037773 | 28 | 18.69111748 |
| hypothalamus        | 1.496056241 | 5  | 3.342120344 |
| forearm             | 1.493290888 | 25 | 16.74154728 |
| esophagus           | 1.488439955 | 19 | 12.76504298 |
| lips                | 1.484925845 | 21 | 14.14212034 |
| coagulation system  | 1.484032827 | 20 | 13.47679083 |
| wrist               | 1.483302975 | 28 | 18.87679083 |
| spleen              | 1.481808087 | 13 | 8.773065903 |
| inner ear           | 1.468855219 | 6  | 4.084813754 |
| maxilla             | 1.462810547 | 33 | 22.55931232 |
| mandible            | 1.459806829 | 33 | 22.60573066 |
| jaw                 | 1.454827952 | 33 | 22.68309456 |
| ankle               | 1.454686197 | 28 | 19.24813754 |
| cheek               | 1.446932007 | 12 | 8.293409742 |
| elbow               | 1.443341605 | 27 | 18.70659026 |

|                   |             |    |             |
|-------------------|-------------|----|-------------|
| spinal cord       | 1.436213992 | 29 | 20.19197708 |
| scalp             | 1.436213992 | 5  | 3.481375358 |
| blood vessels     | 1.43461997  | 40 | 27.88194842 |
| arm               | 1.428594819 | 25 | 17.49971347 |
| pelvis            | 1.427152705 | 28 | 19.61948424 |
| shoulder          | 1.426028077 | 28 | 19.63495702 |
| knee              | 1.404991948 | 27 | 19.21719198 |
| hip               | 1.39935846  | 27 | 19.29455587 |
| small intestine   | 1.384400184 | 19 | 13.7243553  |
| vagina            | 1.382451971 | 12 | 8.680229226 |
| mouth             | 1.377242627 | 41 | 29.76962751 |
| white blood cells | 1.375098503 | 24 | 17.45329513 |
| toes              | 1.359034268 | 36 | 26.48939828 |
| red blood cells   | 1.346450617 | 19 | 14.11117479 |
| digit             | 1.344180043 | 37 | 27.5260745  |
| diaphragm         | 1.342455215 | 7  | 5.214326648 |
| fingers           | 1.339474189 | 36 | 26.87621777 |
| foot              | 1.323022101 | 40 | 30.23381089 |
| hand              | 1.322523385 | 38 | 28.73295129 |
| neck              | 1.322454468 | 31 | 23.44126074 |
| large intestine   | 1.312276744 | 20 | 15.24068768 |
| chin              | 1.299523384 | 15 | 11.54269341 |
| blood             | 1.29874454  | 38 | 29.25902579 |
| intestine         | 1.29710426  | 23 | 17.73180516 |
| outer ear         | 1.291301291 | 20 | 15.48825215 |
| upper limb        | 1.290012567 | 40 | 31.00744986 |
| larynx            | 1.287442821 | 10 | 7.767335244 |
| ear               | 1.282452272 | 43 | 33.52951289 |
| lower limb        | 1.274985648 | 42 | 32.94154728 |
| ovary             | 1.238546909 | 11 | 8.881375358 |
| eyelid            | 1.237703149 | 23 | 18.58280802 |
| stomach           | 1.234133631 | 19 | 15.39541547 |
| skull             | 1.232894541 | 38 | 30.8217765  |

|                           |             |    |             |
|---------------------------|-------------|----|-------------|
| nose                      | 1.224449326 | 23 | 18.78395415 |
| penis                     | 1.222722723 | 14 | 11.44985673 |
| ureter                    | 1.219426974 | 12 | 9.840687679 |
| vas deferens              | 1.211805556 | 3  | 2.475644699 |
| hair                      | 1.192428591 | 20 | 16.77249284 |
| meninges                  | 1.192428591 | 10 | 8.386246418 |
| vulva                     | 1.191329578 | 8  | 6.715186246 |
| pituitary gland           | 1.170826624 | 10 | 8.540974212 |
| forehead                  | 1.157977687 | 16 | 13.81719198 |
| peripheral nerve          | 1.125391561 | 28 | 24.88022923 |
| cerebellum                | 1.119568387 | 22 | 19.6504298  |
| lung                      | 1.118293114 | 29 | 25.93237822 |
| skin                      | 1.109521539 | 40 | 36.05157593 |
| urethra                   | 1.102424386 | 8  | 7.256733524 |
| prostate                  | 1.098076232 | 7  | 6.3747851   |
| peripheral nervous system | 1.092914212 | 37 | 33.85444126 |
| face                      | 1.076562404 | 30 | 27.86647564 |
| eye                       | 1.043778392 | 37 | 35.44813754 |
| cranial nerve             | 1.013492383 | 26 | 25.65386819 |
| head                      | 1.000394138 | 48 | 47.98108883 |
| lacrimial apparatus       | 0.994301994 | 2  | 2.011461318 |
| middle ear                | 0.986711903 | 8  | 8.10773639  |
| brain                     | 0.97068602  | 43 | 44.29856734 |
| tongue                    | 0.946459011 | 7  | 7.395988539 |
| gallbladder               | 0.927698033 | 3  | 3.233810888 |
| fallopian tube            | 0.916732335 | 2  | 2.181661891 |
| urinary bladder           | 0.886686992 | 9  | 10.15014327 |
| lymph nodes               | 0.821563089 | 3  | 3.651575931 |
| epiglottis                | 0.755902101 | 2  | 2.645845272 |
| trachea                   | 0.751507321 | 4  | 5.322636103 |
| thymus                    | 0.71021571  | 1  | 1.408022923 |
| bronchus                  | 0.537088335 | 3  | 5.585673352 |
| sinuses                   | 0.529751063 | 1  | 1.887679083 |

|                |             |   |             |
|----------------|-------------|---|-------------|
| olfactory bulb | 0.357069777 | 1 | 2.800573066 |
| parathyroid    | 0           | 0 | 1.021203438 |

### Body Regions

| Name          | Enrichment ratio | Observed | Expected    |
|---------------|------------------|----------|-------------|
| pelvis        | 1.24410442       | 39       | 31.347851   |
| limbs         | 1.227144866      | 42       | 34.22578797 |
| thorax        | 1.193553082      | 47       | 39.3782235  |
| abdomen       | 1.118363354      | 38       | 33.9782235  |
| non-specific  | 1.02173314       | 51       | 49.91518625 |
| head and neck | 1.01110184       | 50       | 49.45100287 |

### Body Systems

| Name            | Enrichment ratio | Observed | Expected    |
|-----------------|------------------|----------|-------------|
| lymphatic       | 1.427402863      | 18       | 12.61031519 |
| urinary         | 1.410402701      | 34       | 24.10659026 |
| reproductive    | 1.349261579      | 30       | 22.23438395 |
| immune          | 1.243624864      | 32       | 25.73123209 |
| cardiovascular  | 1.227699884      | 42       | 34.21031519 |
| endocrine       | 1.215985506      | 20       | 16.44756447 |
| digestive       | 1.129449838      | 36       | 31.8739255  |
| skeleton        | 1.107782113      | 41       | 37.01088825 |
| integumentary   | 1.082120211      | 40       | 36.96446991 |
| respiratory     | 1.081102012      | 32       | 29.59942693 |
| skeletal muscle | 0.999823703      | 39       | 39.00687679 |
| nervous         | 0.94131205       | 44       | 46.74326648 |

| P-value     | FDR         |
|-------------|-------------|
| 0.165648042 | 0.496944125 |
| 0.307534416 | 0.461301624 |
| 0.163725546 | 0.461301624 |

| P-value     | FDR         |
|-------------|-------------|
| 0.199118752 | 0.279397738 |
| 0.007727084 | 0.02759673  |
| 0.013105194 | 0.036534587 |
| 0.033599534 | 0.06999903  |
| 0.192970678 | 0.277824633 |
| 0.023389878 | 0.056307021 |
| 0.005881757 | 0.026027335 |
| 0.082071595 | 0.142485409 |
| 0.003720962 | 0.023450096 |
| 0.026039663 | 0.059181053 |
| 0.041492079 | 0.082325554 |
| 0.001306855 | 0.023450096 |
| 0.002451695 | 0.023450096 |
| 0.002889554 | 0.023450096 |
| 0.075483135 | 0.138755764 |
| 0.016668758 | 0.044331803 |
| 0.002714255 | 0.023450096 |
| 0.003543314 | 0.023450096 |
| 0.080419026 | 0.141582792 |
| 0.003752015 | 0.023450096 |
| 0.003272055 | 0.023450096 |
| 0.004381243 | 0.024807576 |
| 0.001794528 | 0.023450096 |
| 0.005168668 | 0.025843338 |

|             |             |
|-------------|-------------|
| 0.001471181 | 0.023450096 |
| 0.005758151 | 0.026027335 |
| 0.069335539 | 0.131317308 |
| 0.097534098 | 0.164753544 |
| 0.005956357 | 0.026027335 |
| 0.004763055 | 0.024807576 |
| 0.136769527 | 0.208649923 |
| 0.002408089 | 0.023450096 |
| 0.002408089 | 0.023450096 |
| 0.035757252 | 0.073273058 |
| 0.105657034 | 0.171521159 |
| 0.062393468 | 0.120456266 |
| 9.26831E-05 | 0.011585383 |
| 0.023423721 | 0.056307021 |
| 0.00334776  | 0.023450096 |
| 0.029682393 | 0.063970675 |
| 0.016108329 | 0.043772635 |
| 0.002585532 | 0.023450096 |
| 0.006431826 | 0.026027335 |
| 0.20988651  | 0.279397738 |
| 0.012045483 | 0.036534587 |
| 0.033517574 | 0.06999903  |
| 0.025253972 | 0.058458268 |
| 0.029638817 | 0.063970675 |
| 0.007437398 | 0.027343375 |
| 0.079094275 | 0.141239777 |
| 0.193365945 | 0.277824633 |
| 0.003145521 | 0.023450096 |
| 0.003265951 | 0.023450096 |
| 0.003475738 | 0.023450096 |
| 0.009856429 | 0.031600307 |
| 0.10202331  | 0.167801497 |
| 0.013152451 | 0.036534587 |

|             |             |
|-------------|-------------|
| 0.009859296 | 0.031600307 |
| 0.2299403   | 0.29631482  |
| 0.00067696  | 0.023450096 |
| 0.020796196 | 0.051990489 |
| 0.012912093 | 0.036534587 |
| 0.013054994 | 0.036534587 |
| 0.018792118 | 0.048937808 |
| 0.019799197 | 0.050508156 |
| 0.062637258 | 0.120456266 |
| 0.129155677 | 0.201805746 |
| 0.001359019 | 0.023450096 |
| 0.036996025 | 0.074588761 |
| 0.006418309 | 0.026027335 |
| 0.078483134 | 0.141239777 |
| 0.006454779 | 0.026027335 |
| 0.225135472 | 0.296230884 |
| 0.008462112 | 0.028588215 |
| 0.004613626 | 0.024807576 |
| 0.00726274  | 0.027343375 |
| 0.023975173 | 0.056545219 |
| 0.087994028 | 0.150674705 |
| 0.140817944 | 0.212075217 |
| 0.010464611 | 0.032701911 |
| 0.07452259  | 0.138755764 |
| 0.10017792  | 0.1669632   |
| 0.008062692 | 0.027995459 |
| 0.208424372 | 0.279397738 |
| 0.00458401  | 0.024807576 |
| 0.006751862 | 0.026374461 |
| 0.22951062  | 0.29631482  |
| 0.114097015 | 0.182847781 |
| 0.150573323 | 0.224067445 |
| 0.028153401 | 0.062842412 |



|             |             |
|-------------|-------------|
| 0.125216209 | 0.198126912 |
| 0.208793926 | 0.279397738 |
| 0.233114096 | 0.297339408 |
| 0.365335866 | 0.430820596 |
| 0.181345044 | 0.266683888 |
| 0.278003251 | 0.34406343  |
| 0.301997789 | 0.362978112 |
| 0.296602836 | 0.359954898 |
| 0.254252283 | 0.32102561  |
| 0.205602879 | 0.279397738 |
| 0.259071451 | 0.323839314 |
| 0.210107099 | 0.279397738 |
| 0.13687435  | 0.208649923 |
| 0.376244416 | 0.43953787  |
| 0.386770996 | 0.447651615 |
| 0.198171756 | 0.279397738 |
| 0.287327122 | 0.352116571 |
| 0.337156525 | 0.401376815 |
| 0.461168069 | 0.524054624 |
| 0.482435607 | 0.999955911 |
| 0.460872341 | 0.524054624 |
| 0.496581981 | 0.554220961 |
| 0.314086796 | 0.999955911 |
| 0.455978121 | 0.999955911 |
| 0.478112389 | 0.999955911 |
| 0.488596253 | 0.999955911 |
| 0.356458285 | 0.999955911 |
| 0.390028769 | 0.999955911 |
| 0.375165954 | 0.999955911 |
| 0.289360383 | 0.999955911 |
| 0.411812031 | 0.999955911 |
| 0.122813737 | 0.999955911 |
| 0.287510249 | 0.999955911 |

|             |             |
|-------------|-------------|
| 0.137818792 | 0.999955911 |
| 0.176909622 | 0.999955911 |

| P-value     | FDR         |
|-------------|-------------|
| 0.020425754 | 0.040851509 |
| 0.016159744 | 0.040851509 |
| 0.010823877 | 0.040851509 |
| 0.138083612 | 0.207125417 |
| 0.314468159 | 0.377361791 |
| 0.411465353 | 0.411465353 |

| P-value     | FDR         |
|-------------|-------------|
| 0.05485941  | 0.131662584 |
| 0.004890451 | 0.058685416 |
| 0.020728102 | 0.082912406 |
| 0.050746661 | 0.131662584 |
| 0.015999256 | 0.082912406 |
| 0.157939928 | 0.236909891 |
| 0.136004718 | 0.233150945 |
| 0.131120268 | 0.233150945 |
| 0.198318382 | 0.26442451  |
| 0.263732151 | 0.316478581 |
| 0.490610384 | 0.99652954  |
| 0.140450216 | 0.99652954  |
